# Supplementary material for: Residential Proximity to Roadways and Ischemic Placental Disease in a Cape Cod Family Health Study
Source: Int J Environ Res Public Health. 2017 Jun 24;14(7):682. doi: 10.3390/ijerph14070682 (PMC5551120; doi:10.3390/ijerph14070682)
Supplement: Supplementary file 1 [file ijerph-14-00682-s001.pdf]

# Residential Proximity to Roadways and Ischemic Placental Disease in a Cape Cod Family Health Study

Amelia K. Wesselink, Jenny L. Carwile, María Patricia Fabian, Michael R. Winter, Lindsey J. Butler, Shruthi Mahalingaiah and Ann Aschengrau

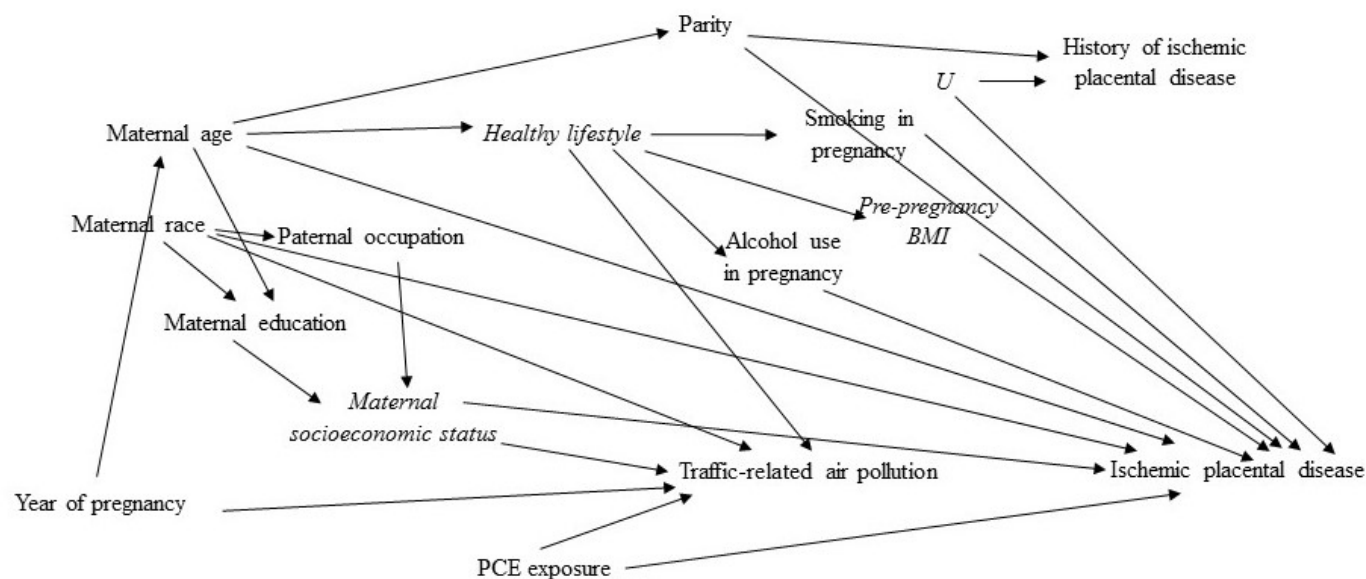

**Figure S1.** Directed acyclic graph showing potential confounders of the relationship between traffic-related air pollution and ischemic placental disease. Variables in italics were not measured in our study.
